# Supplementary material
Source: Springer Nature journal article supplement (https://www.springermedizin.de/resource/supplementary/12889_2012_4092_MOESM1_ESM.pdf/9491558)
Supplement: MOESM1 [file 9491558]

Patients  $\geq 65$  years of age assigned to the participating health centres and with no exclusion criteria  
N= 3556

Informed consent given?

No

EXCLUSION  
No consent given

Yes

Vitamin B12 < 179pg/mL

No

EXCLUSION  
Inclusion criteria not met

Yes

Exclusion criteria detected in analytical results

Yes

EXCLUSION  
Exclusion criteria detected

No

Randomisation (n=320)

Oral group  
n=160

IM group  
n=160

Follow-up  
8, 26 and 52 weeks
